# Supplementary material
Source: MDPI journal article supplement (https://www.mdpi.com/2073-4395/12/11/2906)
Supplement: s1 [file s1 › agronomy-2043068-supplementary.pdf]

**Table S1.** T Antifungal activities of selected rhizospheric fungi against *F. equiseti*

| Strain | Inhibition Rate (%)      | Inhibition Zone (mm)    |
|--------|--------------------------|-------------------------|
| MR-57  | 60.00±1.92 <sup>a</sup>  | 9.05±0.49 <sup>a</sup>  |
| MR-84  | 58.15±0.64 <sup>ab</sup> | 5.66±0.22 <sup>c</sup>  |
| MR-39  | 57.78±2.94 <sup>ab</sup> | 5.67±0.41 <sup>c</sup>  |
| MR-37  | 57.78±2.22 <sup>ab</sup> | 3.93±0.38 <sup>d</sup>  |
| MR-43  | 57.04±2.57 <sup>ab</sup> | 5.74±0.41 <sup>c</sup>  |
| MR-34  | 56.67±1.11 <sup>ab</sup> | 6.68±0.51 <sup>b</sup>  |
| MR-96  | 56.30 ±1.28 <sup>b</sup> | 5.71 ±0.30 <sup>c</sup> |
| MR-68  | 55.19 ±0.64 <sup>b</sup> | 5.41 ±0.14 <sup>c</sup> |

<sup>1</sup> Mycelia of *F. equiseti* cultured on PDA media during dual culture assays and confrontation culture assays with 104 fungal isolates from rhizospheric soil at 25 °C, respectively. Data are presented as the means ± SD of three replications. Different letters in the same column indicate the results of Duncan's DMRT ( $p < 0.05$ ).
